# Supplementary material for: Rational control of the interlayer space inside two-dimensional titanium carbides for highly efficient uranium removal and imprisonment
Source: Royal Society of Chemistry journal article supplement (doi:10.1039/c7cc06740b), 2017-01-01
Supplement: c7cc06740b1.pdf [file c7cc06740b1.pdf]

# Supplementary information

## Rational control of interlayer space inside two-dimensional titanium carbides for highly efficient uranium removal and imprisoning

Lin Wang,<sup>a†</sup> Wuqing Tao,<sup>a,b†</sup> Liyong Yuan,<sup>a</sup> Zhirong Liu,<sup>b</sup> Qing Huang,<sup>c</sup>

Zhifang Chai,<sup>a</sup> John K. Gibson,<sup>d</sup> and Weiqun Shi<sup>\*a</sup>

<sup>a</sup> Laboratory of Nuclear Energy Chemistry and Key Laboratory for Biomedical Effects of Nanomaterials and Nanosafety, Institute of High Energy Physics, Chinese Academy of Sciences, Beijing 100049, China

E-mail: shiwq@ihep.ac.cn

<sup>b</sup> School of Chemistry, Biological and Materials Sciences, East China University of Technology, Nanchang, 330013, China

<sup>c</sup> Ningbo Institute of Material Technology and Engineering, Chinese Academy of Sciences, Ningbo 315201, China

<sup>d</sup> Chemical Sciences Division, Lawrence Berkeley National Laboratory (LBNL), Berkeley, California 94720, United States

<sup>†</sup> L. Wang and W. Tao contributed equally to this work.

## Experimental Section

### Materials.

*Synthesis of pristine and intercalated  $Ti_3C_2T_x$  MXenes.*  $Ti_3AlC_2$  powders with purity >99 wt % and particle size < 19  $\mu m$  (i.e., 800 mesh) were purchased from Beijing Jinhezhi Materials Co., Ltd. 0.5 g  $Ti_3AlC_2$  powders were first slowly added in portions into 10 mL 15 wt % HF (diluted from 40 wt % HF, Sinopharm Chemical Reagent Co., Ltd.). The mixture was then stirred and held at 40 °C for 48 h, after which the product was centrifuged at 5000 rpm and washed with deionized water 6 times to obtain a pristine  $Ti_3C_2T_x$  water suspension (labeled as  $Ti_3C_2T_x$ -hydrated). In order to prepare intercalated  $Ti_3C_2T_x$ ,  $Ti_3C_2T_x$ -hydrated was first filtered and immediately dispersed in 1 M NaOH (Sinopharm Chemical Reagent Co., Ltd.) solution at room temperature for 2h, or dispersed in dimethyl sulfoxide (DMSO, Sinopharm Chemical Reagent Co., Ltd.) at 37 °C for 48 h. The products were then centrifuged and washed with deionized water 6 times to obtain the NaOH activated  $Ti_3C_2T_x$  water suspension (labeled as  $Ti_3C_2T_x$ -NaOH-hydrated) and the DMSO intercalated  $Ti_3C_2T_x$  water suspension (labeled as  $Ti_3C_2T_x$ -DMSO-hydrated). The corresponding dry samples (labeled as  $Ti_3C_2T_x$ -dry,  $Ti_3C_2T_x$ -NaOH-dry and  $Ti_3C_2T_x$ -DMSO-dry, respectively) were prepared by filtering various  $Ti_3C_2T_x$  water suspensions on 0.45  $\mu m$  nylon membranes and drying in a vacuum oven at room temperature for 12 h. Generally, the concentrations of the studied hydrated  $Ti_3C_2T_x$  samples were in the range of 10-15 mg mL<sup>-1</sup>. The actual concentrations of the

hydrated samples were obtained by measuring the mass of the dry sample on the filtering membrane for a fixed volume of suspension.

*Calcination of  $Ti_3C_2T_x$  after uranium sorption.* 200 mg of  $Ti_3C_2T_x$ -hydrated was first used to uptake U(VI) at the condition of pH=5.0,  $[U]_{initial}=100\text{ mg L}^{-1}$ ,  $m/V=0.4\text{ g MXene L}^{-1}$  and  $t=360\text{ min}$ , and then the sorbent was collected by filtering and was dried in a vacuum oven. The dry U(VI)-sorbed MXene sample was transferred into a quartz tube furnace and was calcined at the desired temperature for 10 min, using a heating rate of  $20\text{ }^{\circ}\text{C min}^{-1}$  to the calcination temperature, under an air or nitrogen atmosphere.

### **Characterization.**

The morphologies and chemical compositions of the MXene samples were measured by a Hitachi S-4800 field-emission scanning electron microscope (SEM) equipped with Horiba 7593-H energy-dispersive X-ray spectroscopy (EDS). A Bruker D8 Advance diffractometer (Cu  $K\alpha$  radiation,  $\lambda = 1.5406\text{ \AA}$ ) was used to collect powder X-ray diffraction (XRD) patterns. The step size for XRD pattern scanning was  $0.02^{\circ}$ . Hydrated samples were obtained by rapidly filtering the MXene suspensions with  $0.45\text{ }\mu\text{m}$  nylon filtration membranes, and then immediately subjected them to XRD measurements in wet conditions. A Bruker Tensor 27 spectrometer was used to record the fourier transform infrared (FTIR) spectra of samples by a potassium bromide pellet method. The residual concentrations of uranium and other metal

elements were determined by an inductively coupled plasma optical emission spectrograph (ICP-OES, Horiba JY2000-2, Japan). The low concentrations of uranium at ppb levels in the uranium-contaminated water treatment test were measured by a Thermo Fisher Element XR high resolution inductively coupled plasma mass spectrometer (HR-ICP-MS). UV-vis spectra of solution samples were measured by a Hitachi U-3900 spectrophotometer to determine the residual concentrations of methylene blue (MB) in the dye sorption experiments. In order to predetermine the suitable calcination temperature for dry U(VI) sorbed MXene samples, a Q500 thermogravimetry (TA Instruments) was used to acquire thermogravimetric curves over the range of 20 – 1000 °C with a heating rate of 20 °C min<sup>-1</sup> in air. X-ray absorption near edge-structure (XANES) spectra of the U L<sub>III</sub>-edge (17,166 eV) for samples and reference compounds were collected at the beamline 1W1B of the Beijing Synchrotron Radiation Facility (BSRF). The U L<sub>III</sub>-edge XANES spectra of UO<sub>2</sub> and UO<sub>2</sub>(NO<sub>3</sub>)·6H<sub>2</sub>O were measured in transmission mode. The U L<sub>III</sub>-edge XANES spectra of U-sorbed Ti<sub>3</sub>C<sub>2</sub>T<sub>x</sub> was measured in fluorescence mode using a lytle-type ion chamber detector. The incident X-ray beam was modulated to desired energies by using a silicon (111) double-crystal monochromator.

### **Batch sorption experiments.**

*Removal of U(VI).* A series of sorption experiments for U(VI) uptake in aqueous solution by various Ti<sub>3</sub>C<sub>2</sub>T<sub>x</sub> MXene samples was carried out as a function of contact

time, pH, initial U(VI) concentration ( $[U]_{\text{initial}}$ ), ionic strength, other competing metal cations, solid-liquid ratio and storage time. A proper amount of  $\text{UO}_2(\text{NO}_3)_2 \cdot 6\text{H}_2\text{O}$  (Sinopharm Chemical Reagent Co. Ltd.) was first dissolved in deionized water to prepare a  $400 \text{ mg L}^{-1}$  U(VI) stock solution. The U(VI) stock solution was then diluted to initial concentrations ranging from 5 to  $220 \text{ mg L}^{-1}$  to perform U(VI) uptake experiments by a batch method. Typically,  $4 \text{ mg Ti}_3\text{C}_2\text{T}_x$  MXene sample was mixed with an appropriate amount of deionized water to keep the total volume of suspension as  $5 \text{ mL}$  in a  $20 \text{ mL}$  beaker. Then  $5 \text{ mL}$  of solution containing U(VI) or multi-metal ions was added such that the concentration of sorbent was  $0.4 \text{ g L}^{-1}$ . The pH value of the solution was adjusted with small amounts of  $0.1 \text{ M NaOH}$  and  $0.1 \text{ M HNO}_3$ , and then the mixture solution was stirred at room temperature for a specified time. The solid extractant was removed after U(VI) sorption to obtain the supernatant sample by using a polyethersulfone syringe filter ( $0.22 \text{ }\mu\text{m}$ , ANPEL Scientific Instrument Co., Ltd., Shanghai). The supernatant was diluted with  $5 \text{ wt\% HNO}_3$  before the final concentration was determined by ICP-OES or HR-ICP-MS. For the ionic strength tests,  $\text{NaClO}_4$  ( $0.1\text{-}500 \text{ mmol L}^{-1}$ ),  $\text{Ca}(\text{NO}_3)_2$  ( $1\text{-}200 \text{ mmol L}^{-1}$ ) and  $\text{Mg}(\text{NO}_3)_2$  ( $1\text{-}200 \text{ mmol L}^{-1}$ ) were selected as representative electrolytes while  $[U]_{\text{initial}}$  was fixed as  $40 \text{ mg L}^{-1}$ . In the selective sorption test, all initial concentrations of U(VI) and other competing metal ions, including  $\text{Co}^{2+}$ ,  $\text{Ni}^{2+}$ ,  $\text{Zn}^{2+}$ ,  $\text{Sr}^{2+}$ ,  $\text{La}^{3+}$ ,  $\text{Nd}^{3+}$ ,  $\text{Sm}^{3+}$ ,  $\text{Gd}^{3+}$  and  $\text{Yb}^{3+}$ , were  $0.5 \text{ mmol L}^{-1}$ . In the solid-liquid ratio test,  $4 \text{ mg Ti}_3\text{C}_2\text{T}_x\text{-DMSO-hydrated}$  and  $0.6 \text{ mg U(VI)}$  were mixed with different volumes of deionized water to change the

dosage of sorbents from 0.4 g L<sup>-1</sup> to 0.02 g L<sup>-1</sup>. In the experiment for simulated uranium-contaminated water treatment, a stock solution of uranium contaminated water including 1 mg L<sup>-1</sup> U(VI), 200 mg L<sup>-1</sup> Na(I), 100 mg L<sup>-1</sup> Ca(II) and 100 mg L<sup>-1</sup> Mg(II) was first prepared. The desired volume of the stock solution from 2.5 mL to 125 mL was mixed with an equal volume of Ti<sub>3</sub>C<sub>2</sub>T<sub>x</sub>-DMSO-hydrated aqueous solution which contained 25 mg sorbent to achieve the treated capacity in the range of 200~10000 kg water per kg sample.

*Removal of Cu(II) and Cd(II).* A 12 mg sample of Ti<sub>3</sub>C<sub>2</sub>T<sub>x</sub>-DMSO-dry or Ti<sub>3</sub>C<sub>2</sub>T<sub>x</sub>-DMSO-hydrated was mixed with an appropriate amount of water to keep the total volume of suspension as 15 mL. Then, 15 mL of solution containing 100 mg L<sup>-1</sup> Cu(II) or Cd(II) (as Cu(NO<sub>3</sub>)<sub>2</sub>·3H<sub>2</sub>O or Cd(NO<sub>3</sub>)<sub>2</sub>·4H<sub>2</sub>O, Beijing Chemical Works) was added and the composite solution was stirred at room temperature. 0.1 mol L<sup>-1</sup> NaOH was then used to adjust the solution pH to about 5. MXene samples were separated at different intervals from 5 to 360 min. The concentrations of Cu(II) or Cd(II) in the supernatant solution after the sorption process was determined using ICP-OES.

*Removal of MB(Methylene Blue).* A 12 mg sample of Ti<sub>3</sub>C<sub>2</sub>T<sub>x</sub>-dry, Ti<sub>3</sub>C<sub>2</sub>T<sub>x</sub>-hydrated or Ti<sub>3</sub>C<sub>2</sub>T<sub>x</sub>-DMSO-hydrated was mixed with an appropriate amount of water to keep the total volume of suspension as 15 mL. Then, 15 mL of solution containing 100 mg L<sup>-1</sup> MB (C<sub>16</sub>H<sub>18</sub>N<sub>3</sub>ClS, Beijing Chemical Works) was added and the composite solution was stirred at room temperature. MXene samples were separated at different intervals from 5 to 360 min. The concentrations of MB in the supernatant

solution after the sorption process was determined by UV-vis spectroscopy with a linear calibration curve over the concentration range of 1-50 mg L<sup>-1</sup>. In addition, MB-sorbed samples were filtered and dried in a vacuum oven at room temperature for 12 h to investigate the intercalation behavior of MB molecules inside galleries of various MXene samples by XRD.

For all batch sorption experiments, the uptake capacity  $q_e$  (mg g<sup>-1</sup>) and distribution coefficient  $K_d$  (mL g<sup>-1</sup>) were calculated using the following equations:

$$q_e = \frac{(C_o - C_e) \times V}{m} \quad (S1)$$

$$K_d = \frac{C_o - C_e}{C_e} \times \frac{V}{m} \quad (S2)$$

where  $C_o$  and  $C_e$  are initial and final equilibrium concentration of cations, respectively; and  $V$  and  $m$  are the volume of solution and the mass amount of solid sorbent in the batch sorption tests, respectively.

Desorption and leaching experiments.

*Desorption of U(VI) from U-sorbed Ti<sub>3</sub>C<sub>2</sub>T<sub>x</sub>-DMSO-hydrated sample.* U(VI) sorption onto the Ti<sub>3</sub>C<sub>2</sub>T<sub>x</sub>-DMSO-hydrated sample was first performed for pH=5.0, [U]<sub>initial</sub>=100 mg L<sup>-1</sup>, m/V=0.4 g L<sup>-1</sup> and t=360 min. After sorption, the solution was centrifuged under 8000 rpm for 30 min to decant the supernatant. Then 0.01, 0.1 and 0.2 mol L<sup>-1</sup> HNO<sub>3</sub> were used as eluents to treat the sediment for 30 min to evaluate the desorption efficiency of U(VI) under acidic conditions.

*Leaching of uranium from calcined U-sorbed Ti<sub>3</sub>C<sub>2</sub>T<sub>x</sub> samples.* 5 mg of calcined U-

sorbed  $\text{Ti}_3\text{C}_2\text{T}_x$  samples prepared under different temperatures and atmospheres was immersed in 15 mL aqueous solutions (deionized water or various concentrations of  $\text{Na}_2\text{CO}_3$  and  $\text{HNO}_3$ ) by shaking for 24 h. The supernatants were separated and diluted with 5 wt%  $\text{HNO}_3$  for the uranium concentration measurements. The long term test procedure for leaching of uranium from simulated underground water, which contained  $0.29 \text{ mmol L}^{-1} \text{ Ca}(\text{NO}_3)_2$ ,  $0.31 \text{ mmol L}^{-1} \text{ CaBr}_2$ ,  $0.53 \text{ mmol L}^{-1} \text{ MgSO}_4$ ,  $0.45 \text{ mmol L}^{-1} \text{ Na}_2\text{SO}_4$ ,  $0.60 \text{ mmol L}^{-1} \text{ NaHCO}_3$ ,  $0.43 \text{ mmol L}^{-1} \text{ KHCO}_3$  and  $0.011 \text{ mmol L}^{-1} \text{ Na}_2\text{CO}_3$ , was similar, except that supernatant samples were separated at different intervals from 2 h to 10 days.

#### **Sorption data fitting by kinetics models.**

In order to clarify the sorption process of U(VI) by  $\text{Ti}_3\text{C}_2\text{T}_x$ -DMSO-hydrated, the pseudo-first-order kinetic model and the pseudo-second-order kinetic model were used to analyze the experimentally observed kinetic data. The linearized form of the two models are given as follows:

$$\log(q_e - q_t) = \log q_e - \frac{k_1}{2.303} \times t \quad (\text{S3})$$

$$\frac{t}{q_t} = \frac{1}{k_2 q_e^2} + \frac{t}{q_e} \quad (\text{S4})$$

where  $q_e$  (mg/g) and  $q_t$  (mg/g) are the quantities of the sorbed U(VI) at equilibrium time and time  $t$  respectively, and  $k_1$  (1/min) and  $k_2$  (g/(mg·min)) are the pseudo-first-order and pseudo-second-order sorption rate constants, respectively. Plots of  $\log(q_e - q_t)$  versus  $t$ , and  $t/q_t$  versus  $t$  give straight lines, and  $k_1$  and  $k_2$  are derived from the



slopes. The model parameters and correlation coefficients obtained by both the models are listed in Table S1.

### **Sorption data fitting by isotherm models**

The Langmuir model and Freundlich model are two common models to describe sorption isotherms. The Langmuir model assumes that sorption occurs on a homogenous surface by a finite monolayer sorption and the sorption energy decreases as the distance from the surface increases. The Langmuir isotherm model can be described as follows:

$$\frac{C_e}{q_e} = \frac{1}{q_m k_L} + \frac{C_e}{q_m} \quad (S5)$$

where  $q_m$  is the maximum sorption capacity corresponding to a complete monolayer coverage (mg/g) and  $k_L$  is a constant indirectly related to the sorption capacity and energy of sorption (L/mg), which characterizes the affinity of the adsorbate for the adsorbent. A linearized plot is obtained when  $C_e/q_e$  is plotted against  $C_e$ ;  $q_m$  and  $k_L$  are derived from the slope and intercept.

The Freundlich model is basically empirical, and can be applied to non-ideal sorption on heterogeneous surfaces as well as multilayer sorption, and can be expressed as:

$$\ln q_e = \ln k_F + \frac{1}{n} \ln C_e \quad (S6)$$

where  $q_e$  (mg/g) is the equilibrium sorption amount, and  $k_F$  and  $n$  are the Freundlich

constants related to the sorption capacity and the sorption intensity, respectively. A linear relationship was obtained by plotting  $\ln q_e$  against  $\ln C_e$ , and the values of  $k_F$  and  $n$  were calculated from the slope and intercept of the straight line.

Another commonly used isothermal model is that of Dubinin-Raduskevich (D-R). It was also employed to fit the sorption data of U(VI) on  $\text{Ti}_3\text{C}_2\text{T}_x$ -DMSO-hydrated. The D-R model describes sorption on a single type of uniform pore. Its linear expression is expressed as follows:

$$\ln q_e = \ln q_m - \beta \varepsilon^2 \quad (\text{S7})$$

where  $q_m$  (mol/g) represents theoretical monolayer saturation capacity,  $\beta$  ( $\text{mol}^2/\text{kJ}^2$ ) is a constant correlated to sorption energy, and  $\varepsilon$  is the Polanyi potential (kJ/mol) related to the equilibrium concentration, described as:

$$\varepsilon = RT \ln \left( 1 + \frac{1}{C_e} \right) \quad (\text{S8})$$

where  $R$  is the universal gas constant ( $\text{kJ}/(\text{mol} \cdot \text{K})$ ) and  $T$  is the absolute temperature (K). The mean free energy  $E$  (kJ/mol) which is used to estimate the sorption type can be calculated from the constant  $\beta$ :

$$E = (-2\beta)^{-0.5} \quad (\text{S9})$$

where  $q_m$  and  $\beta$  for U(VI) sorption on  $\text{Ti}_3\text{C}_2\text{T}_x$ -DMSO-hydrated were obtained from the linear plot of  $\ln q_e$  against  $\varepsilon^2$ , and accordingly  $E$  was calculated.

The model parameters and correlation coefficient obtained by the above three models are listed in Table S2.

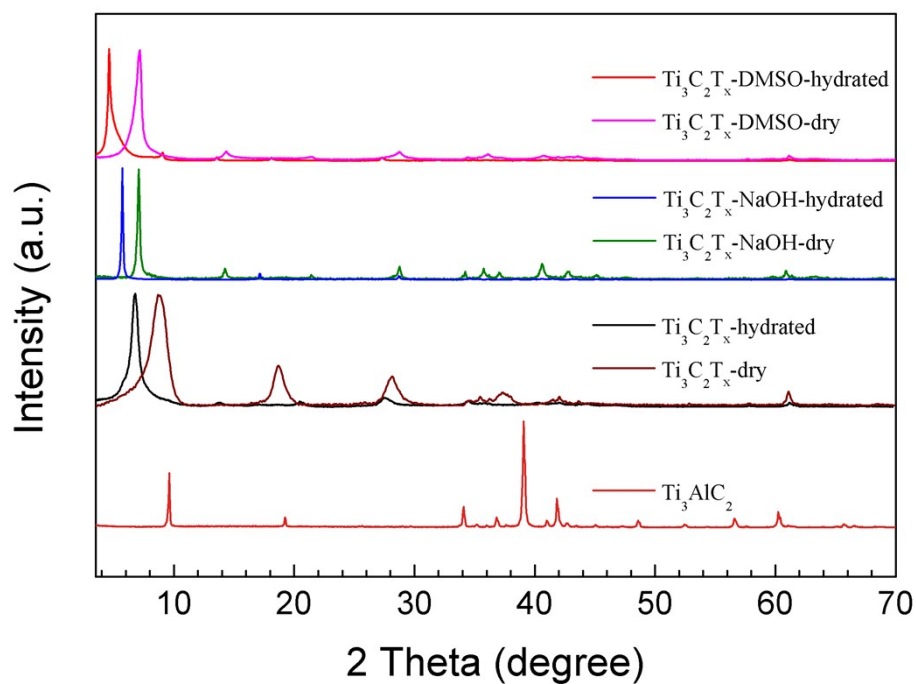

**Fig. S1** Wide angle XRD patterns of pristine and intercalated  $\text{Ti}_3\text{C}_2\text{T}_x$  MXenes under dry and hydrated conditions. The XRD pattern of parent material ( $\text{Ti}_3\text{AlC}_2$ ) before HF etching is also presented for comparison.

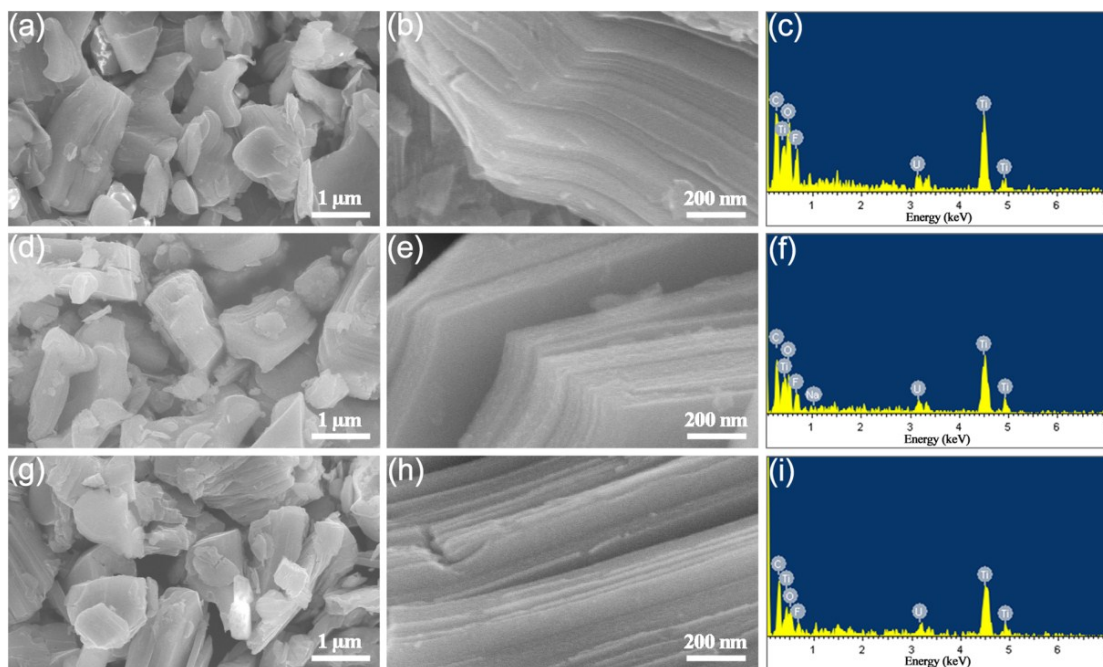

**Fig. S2** SEM images and EDS analysis results of U(VI) sorbed hydrated MXenes after vacuum drying treatment. (a-c)  $\text{Ti}_3\text{C}_2\text{T}_x$ -DMSO-hydrated, (d-f)  $\text{Ti}_3\text{C}_2\text{T}_x$ -NaOH-hydrated, (g-i)  $\text{Ti}_3\text{C}_2\text{T}_x$ -hydrated.

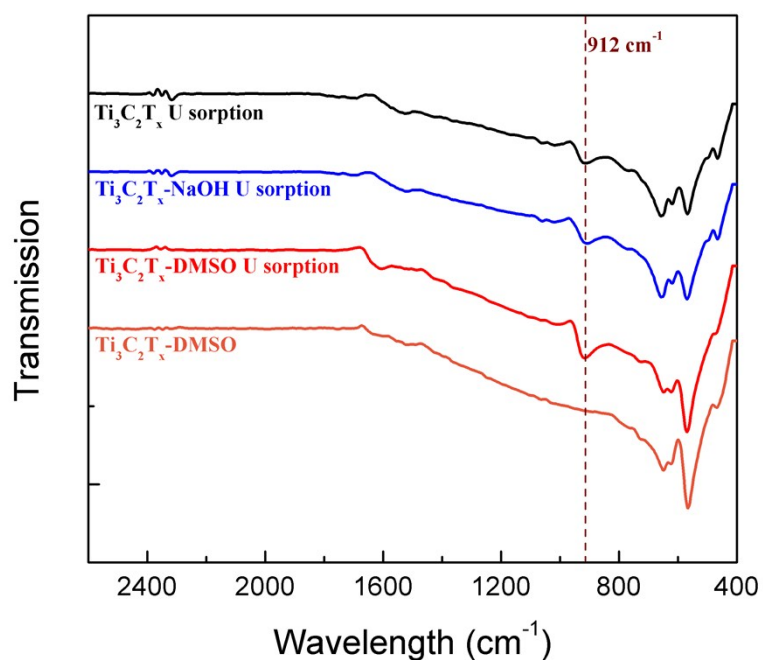

**Fig. S3** FTIR spectra of  $\text{Ti}_3\text{C}_2\text{T}_x$ -DMSO-hydrated and three U(VI) sorbed hydrated MXenes after vacuum drying treatment. The uranyl asymmetric stretch mode is assigned at  $912\text{ cm}^{-1}$ .

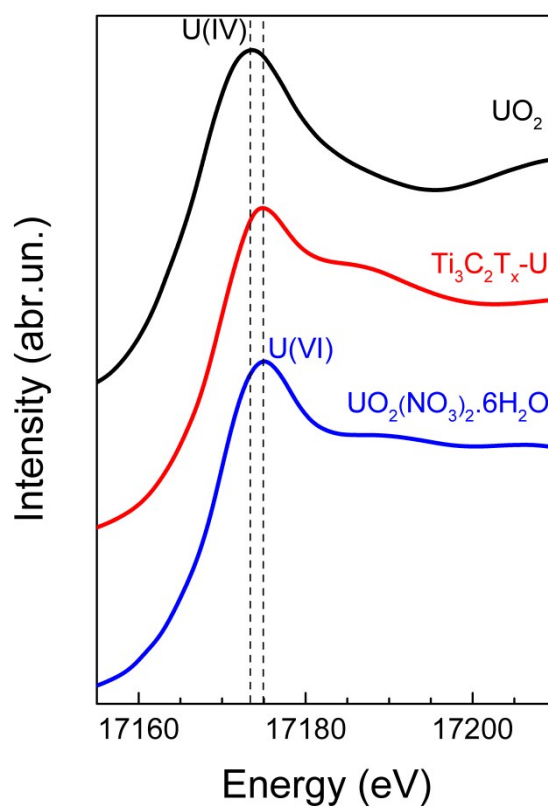

**Fig. S4** XANES spectra of U LIII-edge for sample of  $\text{Ti}_3\text{C}_2\text{T}_x\text{-U}$  and reference compounds.

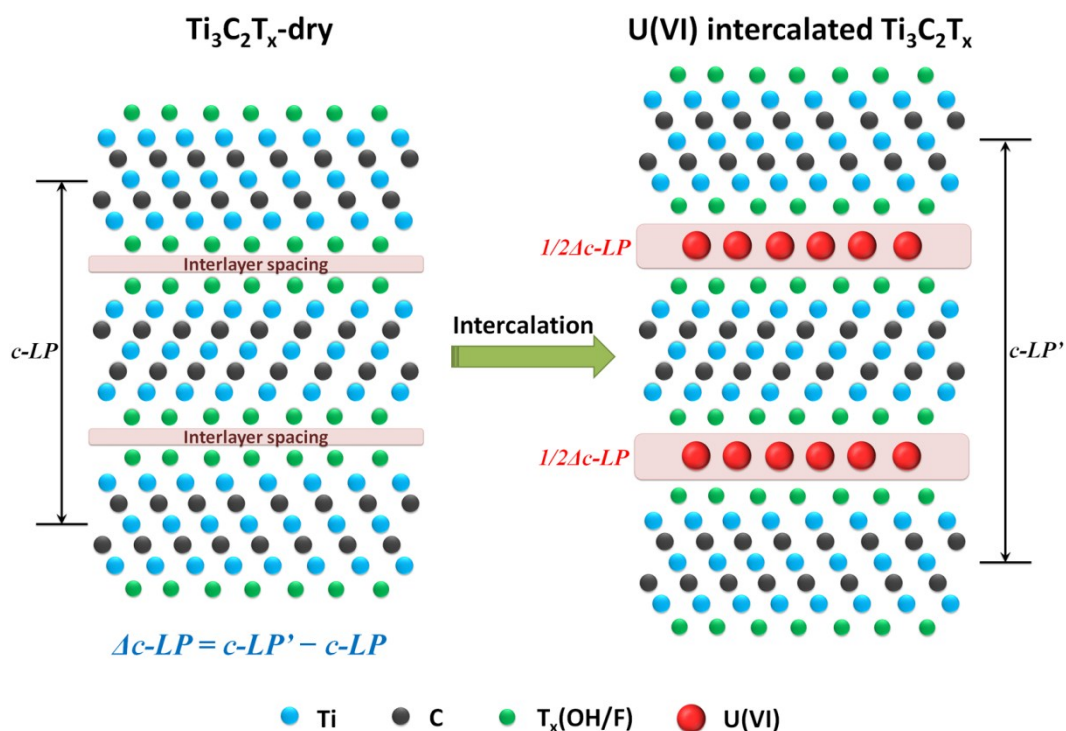

**Fig. S5** An illustration of enlarged  $c-LP$  for U(VI) sorbed MXene in ideal condition, compared with the sample of  $Ti_3C_2T_x$ -dry. The dimension of intercalated hydrated uranyl ion can be estimated by calculating  $1/2\Delta c-LP$ .

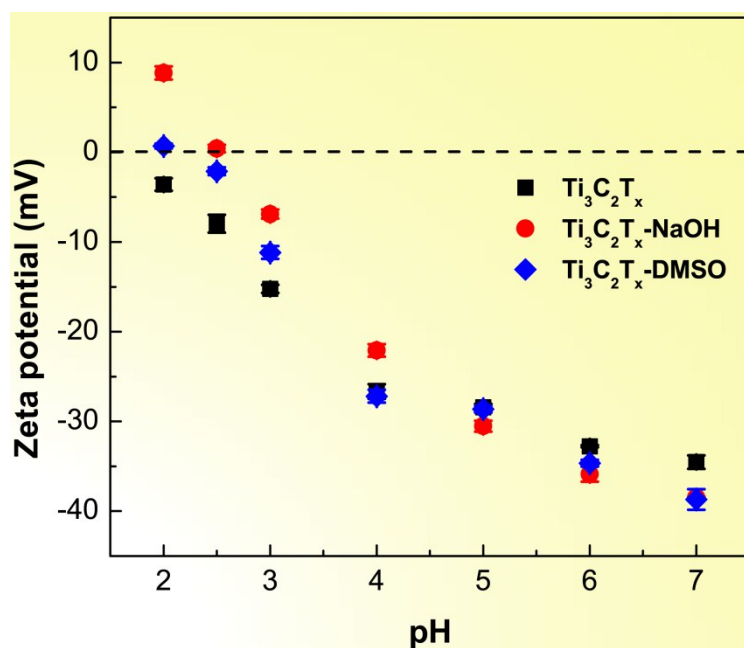

**Fig. S6** Zeta potentials of  $Ti_3C_2T_x$ ,  $Ti_3C_2T_x$ -NaOH and  $Ti_3C_2T_x$ -DMSO water suspensions dependence on solution pH. The concentration of MXene is  $100 \text{ mg L}^{-1}$ .

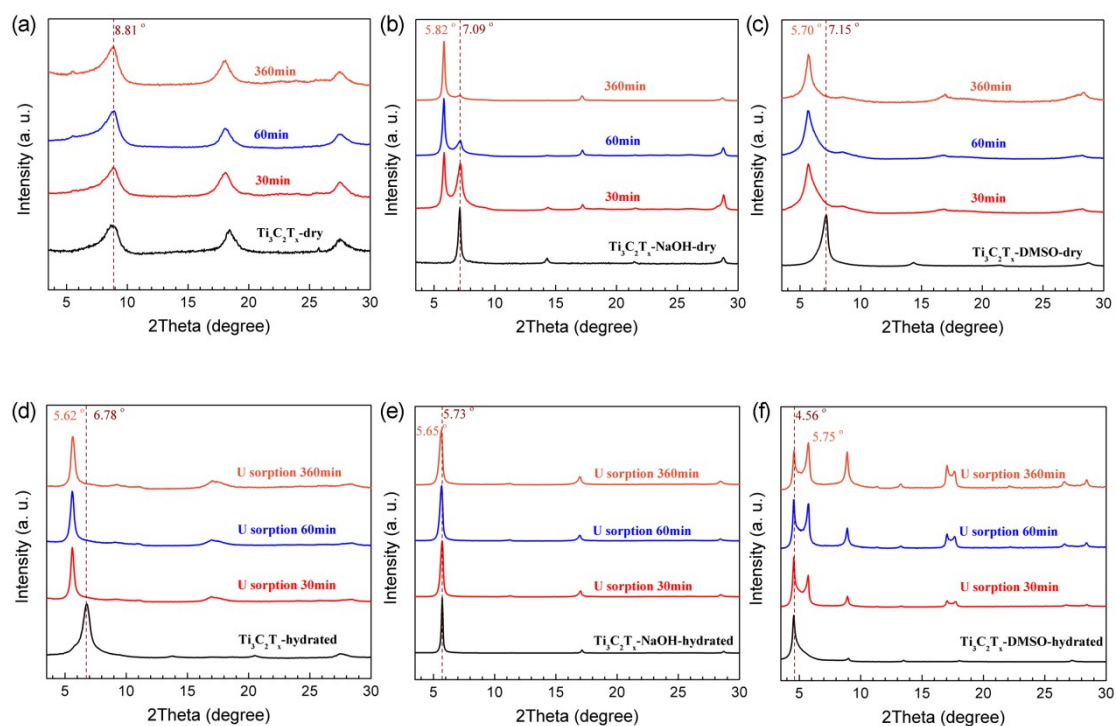

**Fig. S7** (a-c) XRD patterns of dry MXene samples and corresponding wet samples with different immersion times in water. (a)  $\text{Ti}_3\text{C}_2\text{T}_x$ -dry, (b)  $\text{Ti}_3\text{C}_2\text{T}_x$ -NaOH-dry, (c)  $\text{Ti}_3\text{C}_2\text{T}_x$ -DMSO-dry. (d-f) XRD patterns of hydrated MXene samples and corresponding wet samples with different immersion times in  $100 \text{ mg L}^{-1}$  U(VI) solution at  $\text{pH } 5.0 \pm 0.1$ . (d)  $\text{Ti}_3\text{C}_2\text{T}_x$ -hydrated, (e)  $\text{Ti}_3\text{C}_2\text{T}_x$ -NaOH-hydrated, (f)  $\text{Ti}_3\text{C}_2\text{T}_x$ -DMSO-hydrated.

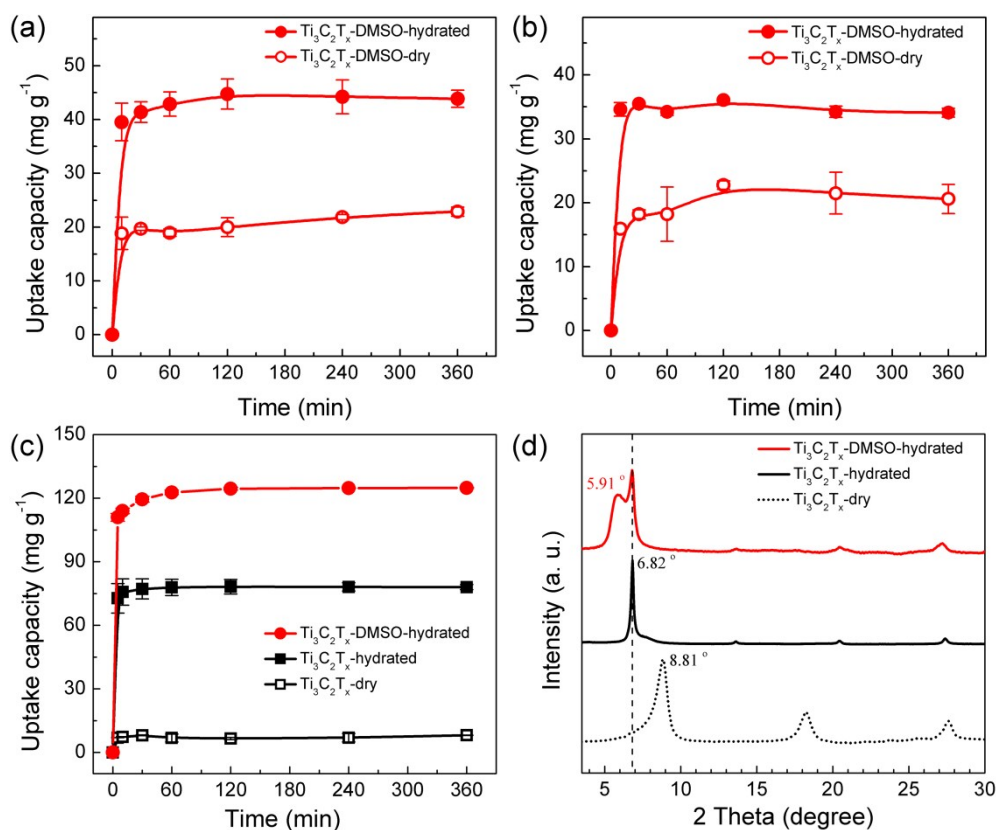

**Fig. S8** (a,b) Sorption kinetics of Cu(II) (a) and Cd(II) (b) by hydrated and dry MXenes. (c,d) Sorption kinetics of MB by different MXenes and XRD patterns of MB-uptaken samples after vacuum drying.

Fig. S7a and Fig. S7b displays that the uptake capacities of Cu(II) and Cd(II) by  $\text{Ti}_3\text{C}_2\text{T}_x$ -DMSO-hydrated have increased 91% and 62% relative to that of  $\text{Ti}_3\text{C}_2\text{T}_x$ -DMSO-dry. Figure S6c shows that sorption amounts of MB by  $\text{Ti}_3\text{C}_2\text{T}_x$ -dry and  $\text{Ti}_3\text{C}_2\text{T}_x$ -hydrated are  $8 \text{ mg g}^{-1}$  and  $78 \text{ mg g}^{-1}$ , respectively.  $\text{Ti}_3\text{C}_2\text{T}_x$ -DMSO-hydrated exhibited an excellent MB sorption capacity of  $125 \text{ mg g}^{-1}$  and a high removal percentage of 99.8%, suggesting a superior dye removal performance compared to previously reported results. The featured intercalation peaks of MB are also identified for hydrated MXenes, as shown in Fig. S7d. The (002) peak at  $2\theta$  of  $6.82^\circ$  corresponds to a  $1/2 \Delta c$ -LP of  $2.91 \text{ \AA}$ , which is close to the smallest dimension of the MB molecule ( $3.25 \text{ \AA} \times 7.60 \text{ \AA} \times 17.0 \text{ \AA}$ ). Another broader peak centered at  $2\theta$  of  $5.91^\circ$

( $1/2 \Delta c\text{-LP} = 4.91 \text{ \AA}$ ) was found for  $\text{Ti}_3\text{C}_2\text{T}_x\text{-DMSO-hydrated}$  after MB sorption. It may be that the large interlayer space of  $\text{Ti}_3\text{C}_2\text{T}_x\text{-DMSO-hydrated}$  allows the co-intercalation of MB with two different dimensions ( $3.25\text{\AA}$  and  $7.60\text{\AA}$ ) in a  $c\text{-LP}$  of MXene, which would accommodate more guest molecules. On the contrary, no change in the XRD pattern was observed for  $\text{Ti}_3\text{C}_2\text{T}_x\text{-dry}$ , due to only exterior surface sorption.

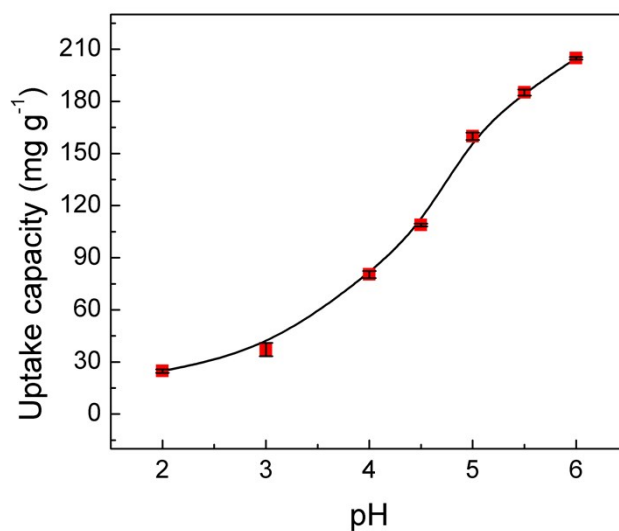

**Fig. S9** Effect of pH on U(VI) sorption behavior in aqueous solution by  $\text{Ti}_3\text{C}_2\text{T}_x\text{-DMSO-hydrated}$ .  $[\text{U}]_{\text{initial}} = 100 \text{ mg L}^{-1}$ ,  $m/V = 0.4 \text{ g L}^{-1}$ .



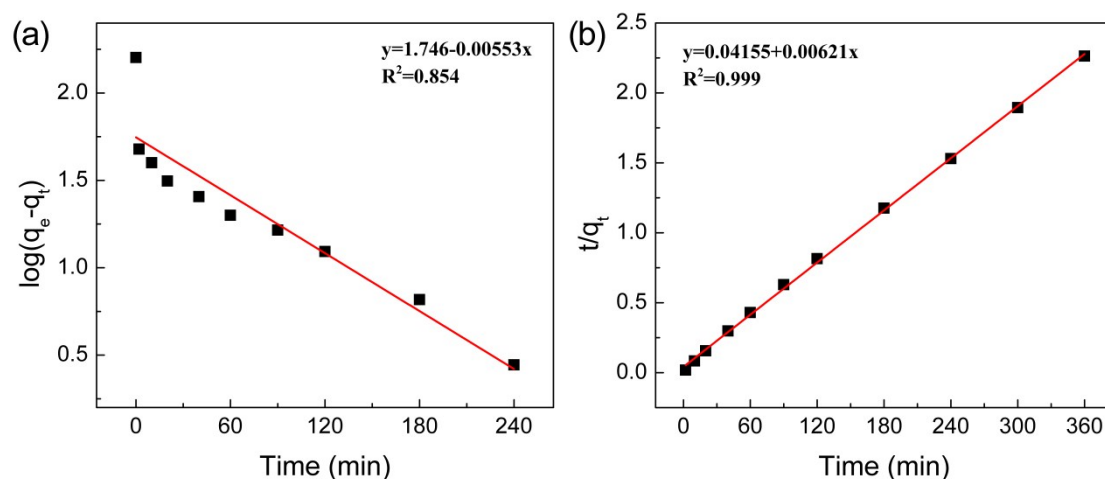

**Fig. S10** The linear fitting of kinetics data for U(VI) sorption by  $\text{Ti}_3\text{C}_2\text{T}_x$ -DMSO-hydrated with the pseudo-first-order kinetic (a) and the pseudo-second-order kinetic (b) models.

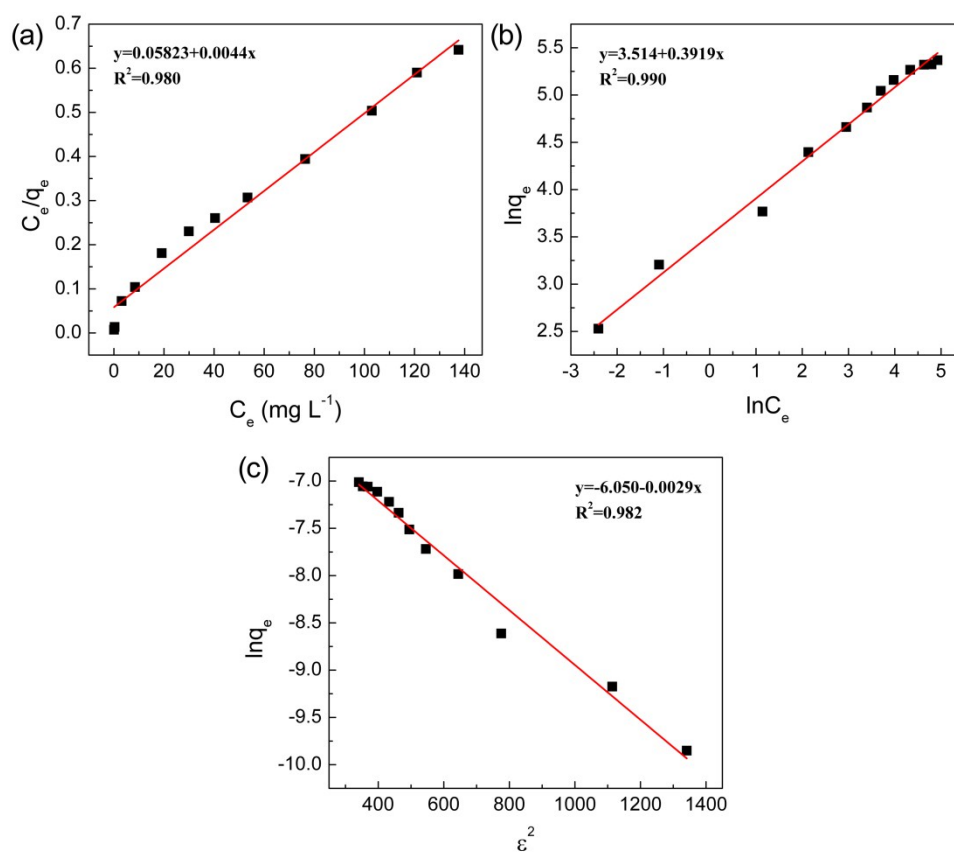

**Fig. S11** The linear fitting of sorption isotherm for U(VI) by  $\text{Ti}_3\text{C}_2\text{T}_x$ -DMSO-hydrated with the Langmuir (a), Freundlich (b) and Dubinin–Raduskevich (c) models.

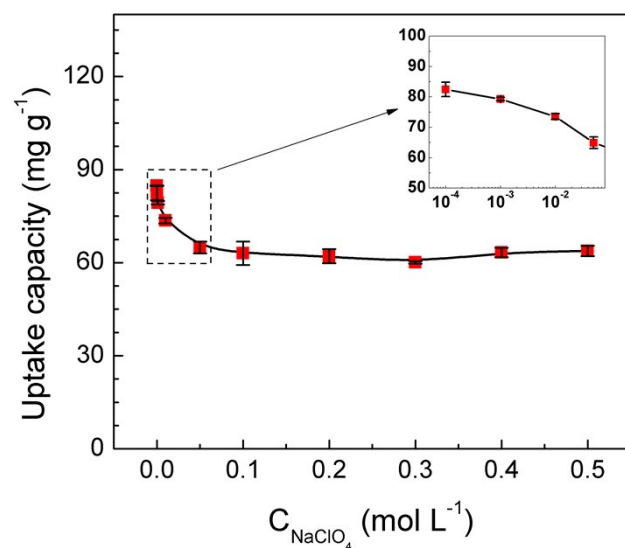

**Fig. S12** Effect of ionic strength U(VI) sorption behavior in aqueous solution by  $\text{Ti}_3\text{C}_2\text{T}_x$ -DMSO-hydrated.  $[\text{U}]_{\text{initial}} = 40 \text{ mg L}^{-1}$ ,  $m/V = 0.4 \text{ g L}^{-1}$ ,  $\text{pH} = 5.0 \pm 0.1$ .

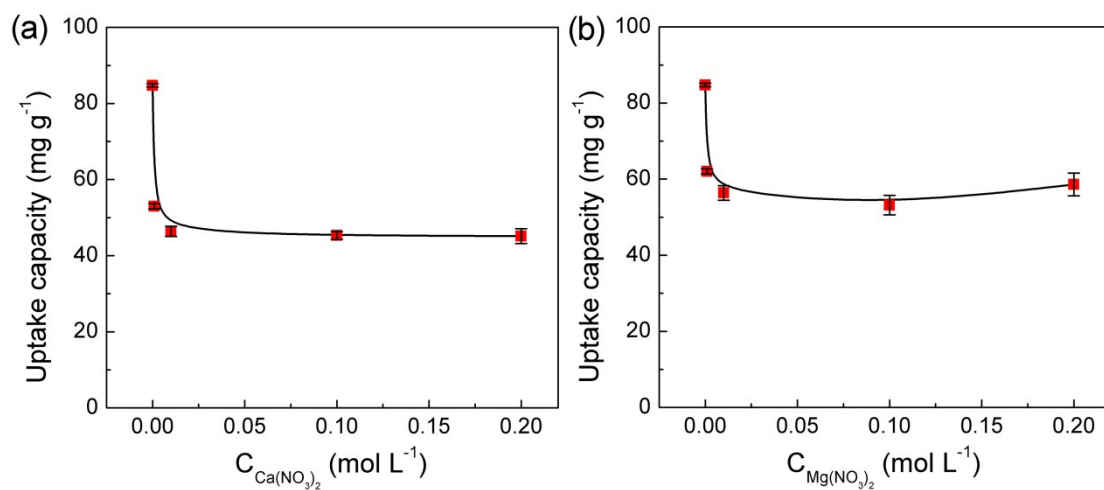

**Fig. S13** Effect of divalent cation on uptake of U(VI) by  $\text{Ti}_3\text{C}_2\text{T}_x$ -DMSO-hydrated. (a)  $\text{Ca(II)}$ , (b)  $\text{Mg(II)}$ .  $[\text{U}]_{\text{initial}} = 40 \text{ mg L}^{-1}$ ,  $m/V = 0.4 \text{ g L}^{-1}$ ,  $\text{pH} = 5.0 \pm 0.1$ .

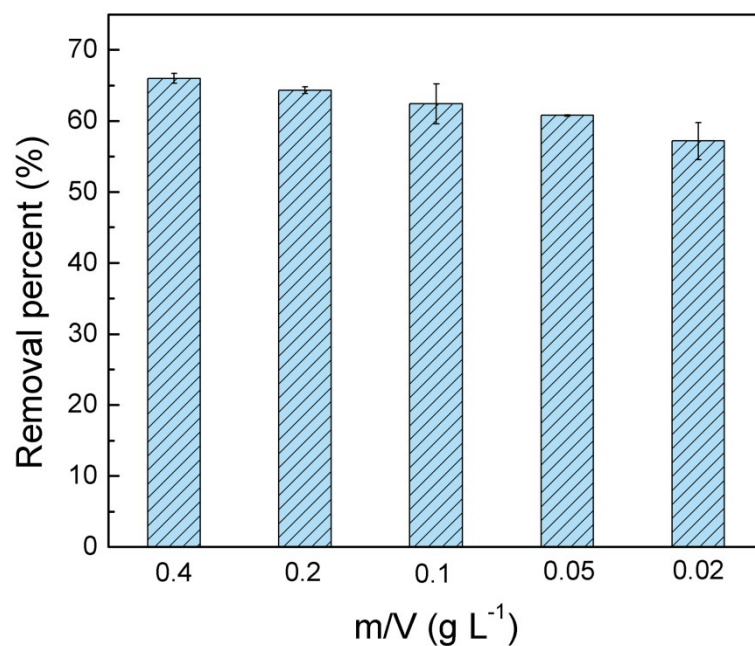

**Fig. S14** Effect of solid-to-liquid ratio on the sorption of U(VI) by  $\text{Ti}_3\text{C}_2\text{T}_x$ -DMSO-hydrated at pH of  $5.0 \pm 0.1$ . Total amount of U(VI) is 0.6 mg and amount of sorbent is 4 mg in all solutions.

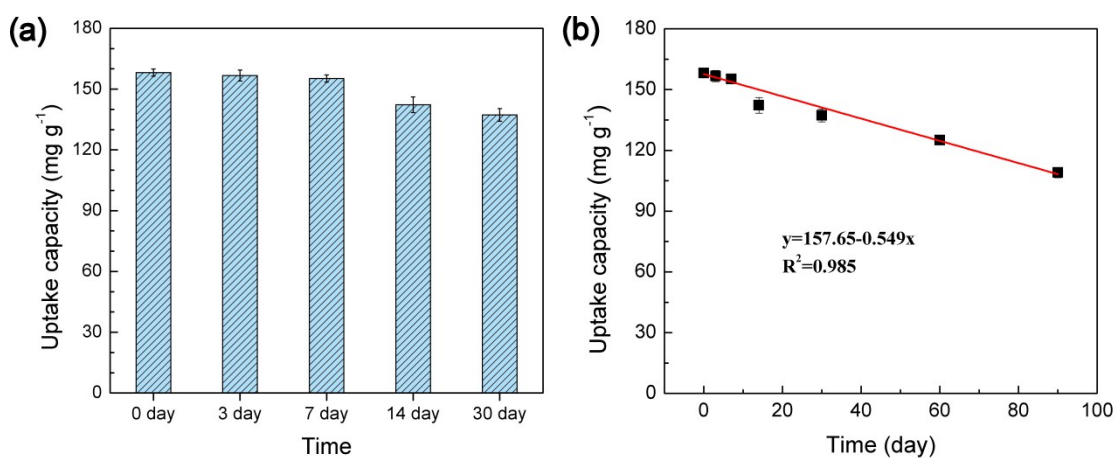

**Fig. S15** The effect of storage time of  $\text{Ti}_3\text{C}_2\text{T}_x$ -DMSO-hydrated in air on U(VI) sorption capacity.

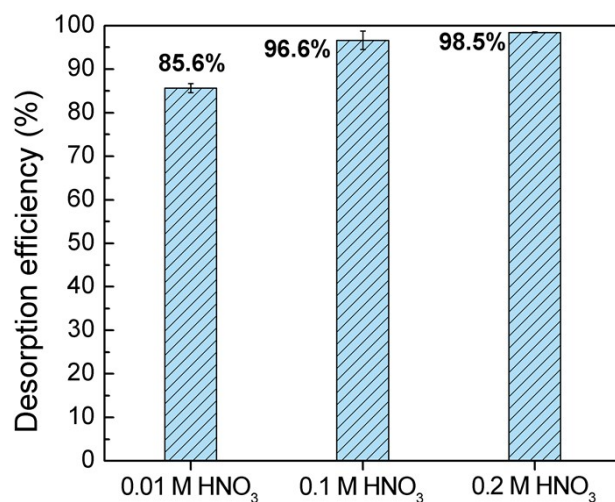

**Fig. S16** Desorption efficiency of U(VI) sorbed  $\text{Ti}_3\text{C}_2\text{T}_\text{x}$ -DMSO-hydrated with different concentrations of  $\text{HNO}_3$  as the eluent.

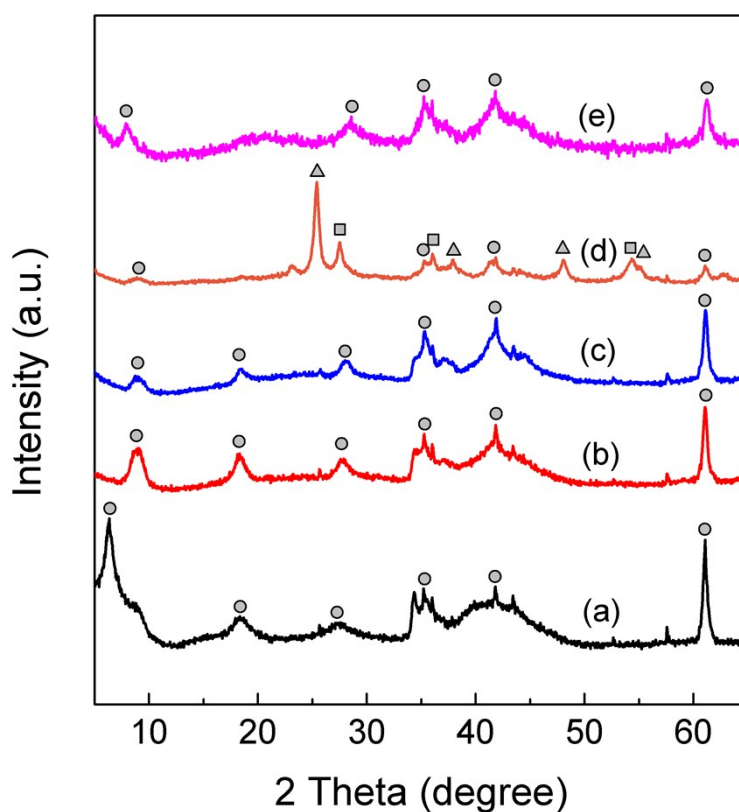

**Fig. S17** XRD patterns of dry sample of U(VI) sorbed  $\text{Ti}_3\text{C}_2\text{T}_\text{x}$ - hydrated and corresponding calcined products under various temperatures and atmospheres. (a) U(VI) sorbed  $\text{Ti}_3\text{C}_2\text{T}_\text{x}$ - hydrated, (b) calcined at 200 °C in air, (c) calcined at 400 °C in air, (d) calcined at 500 °C in air, (e) calcined at 450 °C in  $\text{N}_2$ . ● peak position for  $\text{Ti}_3\text{C}_2\text{T}_\text{x}$  MXene, ▲ anatase (JCPDF card no. 21-1272 ), ■ rutile (JCPDF card no. 21-1276 ).

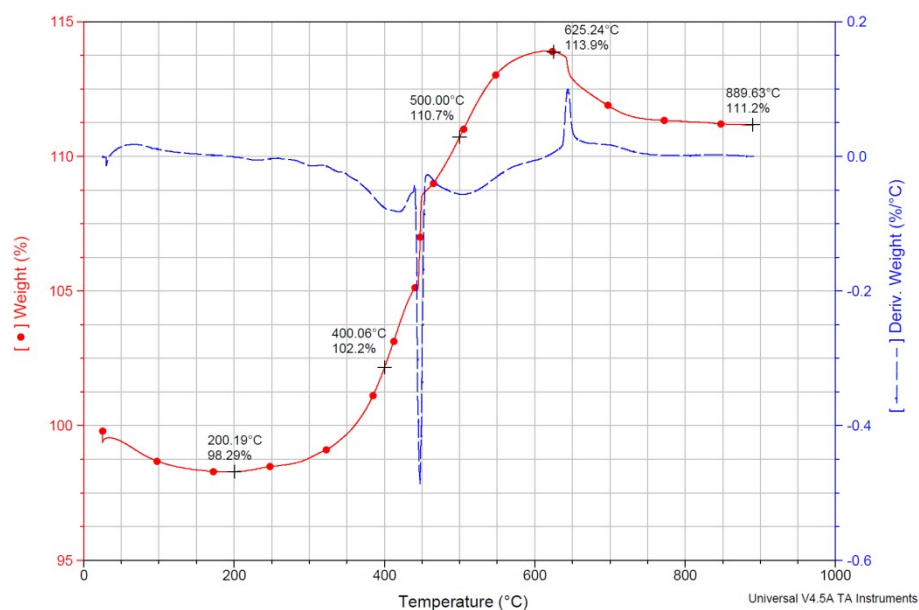

**Fig. S18** Thermogravimetric weight-loss curve and its derivative for U(VI) sorbed  $\text{Ti}_3\text{C}_2\text{T}_x$ -hydrated. The sharp increase of sample weight at 450 °C corresponds to the formation of anatase and rutile.

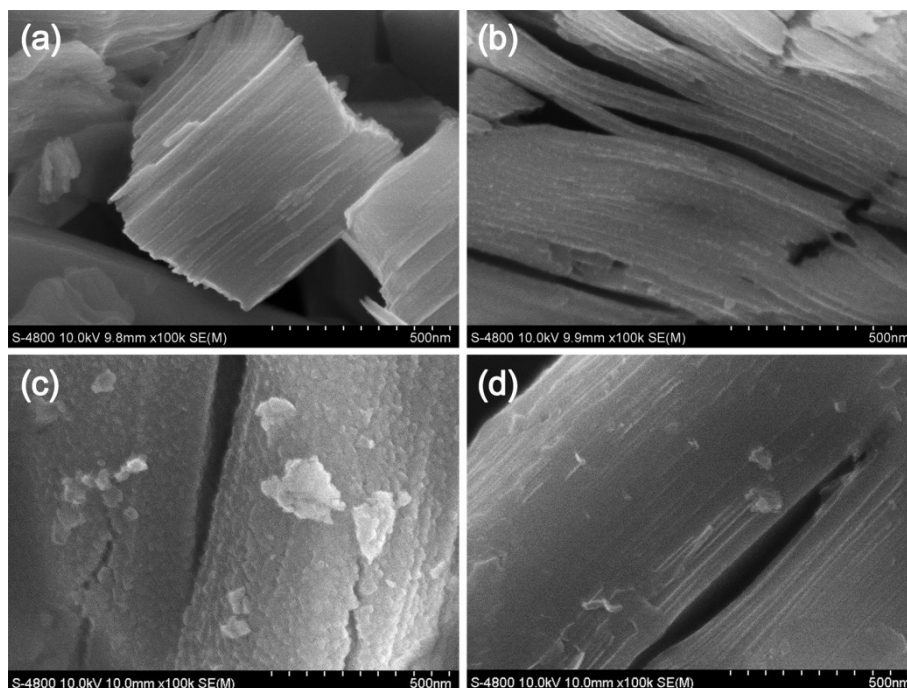

**Fig. S19** SEM images of U(VI) sorbed  $\text{Ti}_3\text{C}_2\text{T}_x$ -hydrated calcined under various temperatures and atmospheres. (a) calcined at 200 °C in air, (b) calcined at 400 °C in air, (c) calcined at 500 °C in air, (d) calcined at 450 °C in  $\text{N}_2$ .

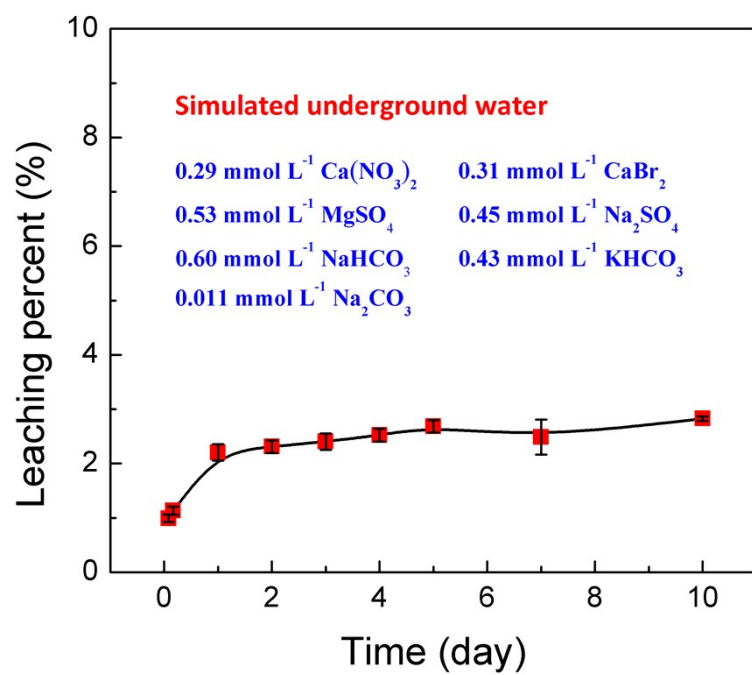

**Fig. S20** Long term test of U(VI) leaching in simulated underground water by air-400 °C calcined sample.

**Table S1. Kinetics model constants and correlation coefficients for U(VI) sorption by Ti<sub>3</sub>C<sub>2</sub>T<sub>x</sub>-DMSO-hydrated.**

| Kinetics model     |                        |       |                     |                                            |       | Saturation capacity from<br>experiment (mg/g) |
|--------------------|------------------------|-------|---------------------|--------------------------------------------|-------|-----------------------------------------------|
| Pseudo-first-order |                        |       | Pseudo-second-order |                                            |       |                                               |
| $q_e(\text{mg/g})$ | $k_f(\text{min}^{-1})$ | $R^2$ | $q_e(\text{mg/g})$  | $k_2 \text{ (g mg}^{-1} \text{ min}^{-1})$ | $R^2$ |                                               |
| 55.7               | 0.01274                | 0.854 | 161                 | $9.28 \times 10^{-4}$                      | 0.999 | 160                                           |

**Table S2. Comparison of isotherm parameters fitting by Langmuir, Freundlich and Dubinin–Raduskevich models for U(VI) sorption by Ti<sub>3</sub>C<sub>2</sub>T<sub>x</sub>-DMSO-hydrated.**

| Isotherm model     |                     |       |                    |      |       |                       |                                   |                    |       |
|--------------------|---------------------|-------|--------------------|------|-------|-----------------------|-----------------------------------|--------------------|-------|
| Langmuir           |                     |       | Freundlich         |      |       | Dubinin–Raduskevich   |                                   |                    |       |
| $q_m(\text{mg/g})$ | $k_L(\text{mL/mg})$ | $R^2$ | $k_F(\text{mg/g})$ | $n$  | $R^2$ | $q_m(\text{mol/g})$   | $\beta(\text{mol}^2/\text{kJ}^2)$ | $E(\text{kJ/mol})$ | $R^2$ |
| 227                | 0.0756              | 0.980 | 33.6               | 2.55 | 0.990 | $2.36 \times 10^{-3}$ | $2.90 \times 10^{-3}$             | 13.1               | 0.982 |
